# Supplementary material
Source: Springer Nature journal article supplement (https://www.springermedizin.de/resource/supplementary/12907_2012_129_MOESM1_ESM.pdf/9524720)

A

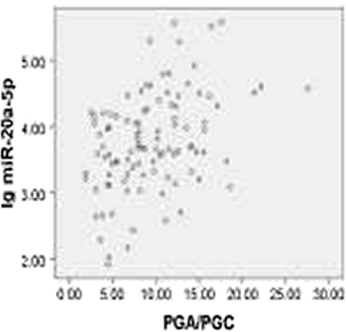

B

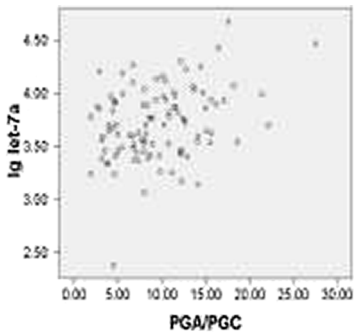

C

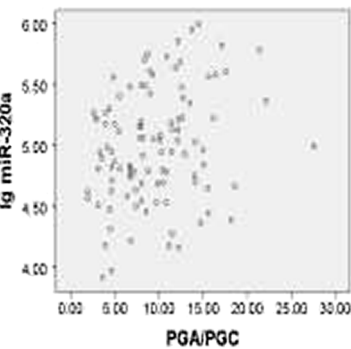

D

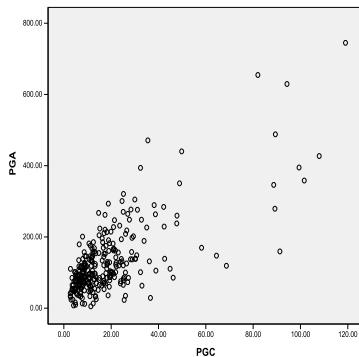

Supplement: MOESM1 [file 9524720]
